# Supplementary material for: Auraptene Enhances AMP-Activated Protein Kinase Phosphorylation and Thereby Inhibits the Proliferation, Migration and Expression of Androgen Receptors and Prostate-Specific Antigens in Prostate Cancer Cells
Source: MDPI journal article supplement (doi:10.3390/ijms242116011), 2023-11-06
Supplement: s1 [file s1]

## Supplementary Figure S1

### (a) **PC3**

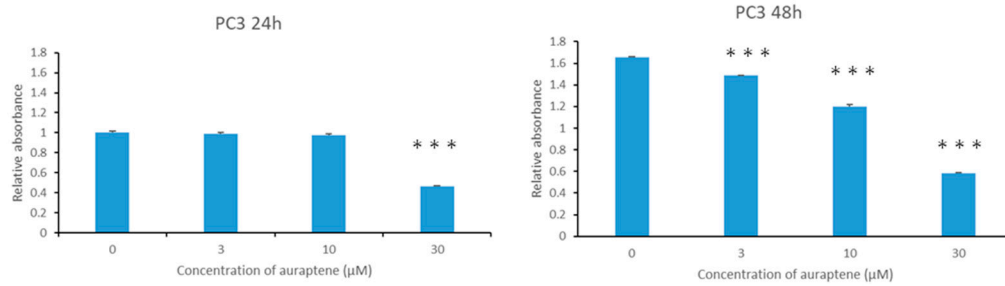

### (b) **HEK-293**

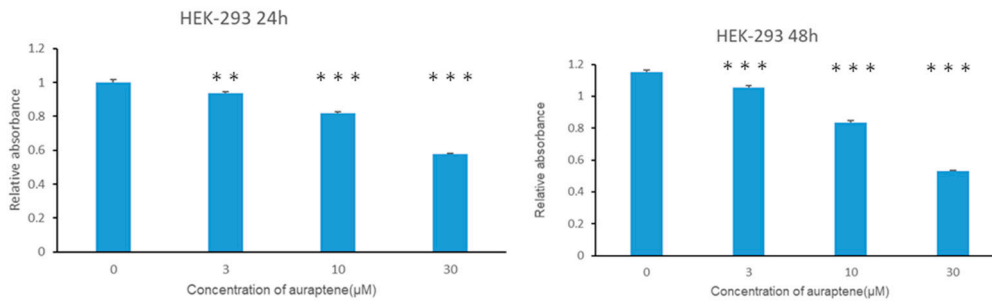

**Figure S1.** CCK-8 assays in PC3 and HEK-293 cells. (a,b) Relative absorbances in PC3 and HEK-293 cells. Cells were treated with auraptene (or vehicle) for 24 or 48 h at the indicated concentrations, and then absorbances at 450 nm were measured 3 h after adding CCK-8 solution. The absorbances (after background subtraction) relative to auraptene untreated cells were calculated ( $n = 4$ ) (\*\*  $p < 0.01$ , \*\*\*  $p < 0.001$ ).
